# Supplementary material
Source: PubMed Central journal article supplement (PMC3362203)
Supplement: NIHMS357664-supplement-01.pdf [file NIHMS357664-supplement-01.pdf]

## ONLINE METHODS

**Expression and purification of sRP105–MD-1.** Bovine, human, and mouse sRP105–MD-1 complexes were expressed extracellularly by a baculovirus expression system using a modified dual expression vector, pAcUW51 (BD Biosciences). The expression vector encodes MD-1 attached to C-terminal thrombin cleavage site and Strep-tag II, and sRP105 to C-terminal thrombin cleavage site and His<sub>6</sub>-tag. To generate sRP105–MD-1 expressing baculovirus, SF9 insect cells were co-transfected with the expression vector DNA and linearized baculovirus DNA, ProFold-ER1 (AB vector). The sRP105 and MD-1 proteins were expressed for 2 days after infecting SF9 or Hi-5 cells with amplified recombinant virus. Secreted protein was purified by Ni-NTA (Qiagen) and Strep-Tactin (IBA) affinity chromatographies. After C-terminal tag cleavage by thrombin, the resulting protein was further purified by gel filtration chromatography. The purified proteins were screened for crystallization, but only bovine RP105–MD-1 generated diffraction quality crystals. As alternative expression to verify the sRP105–MD-1 homodimerization interaction, mouse sRP105 and mouse MD-1 (or its mutant, G52D or G71D) were simultaneously expressed by coinfection of Hi-5 insect cells with sRP105 and MD-1 expressing baculoviruses. The individual baculoviruses were generated using a modified pAcGP67 transfer vector that contains a C-terminal thrombin cleavage site and His<sub>6</sub>-tag. The expressed sRP105 and MD-1 proteins were initially purified by Ni-NTA affinity chromatography and the resulting proteins were analyzed by gel filtration chromatography using a Superdex 200 HR 10/30 gel filtration column.

To improve the X-ray diffraction quality of bovine sRP105–MD-1 crystals beyond ~4Å, reductive methylation of lysine residues was applied to Strep-Tactin column-purified bovine sRP105–MD-1 complex (residues 24-626 and 22-159, respectively), as previously described<sup>37</sup>.

The resultant dimethylated protein complex was further purified by gel filtration chromatography. The methylated complex protein was used to derive the final sRP105–MD-1 structure to 2.91 Å resolution.

Analytical gel filtration analysis showed that lysine methylation did not alter the oligomeric status of the sRP105–MD-1 complex. Consistently, the effect of lysine methylation on the RP105–MD-1 binding interfaces would be minimal since methyl groups are small and a lysine residue is able to make a H-bond even after methylation ( $pK_a$  of unmethylated lysine, 10.2;  $pK_a$  of dimethyl lysine, 10.2-10.4)<sup>38</sup>. However, there is a possibility that methylation may alter the H-bond status of two interface residues (Lys353 in primary interface-B and Lys113 in primary interface-A) from bi- or tri-furcated H-bonds to single H-bonds.

To obtain a different crystal lattice that could provide initial, additional phase information, 11 sRP105-VLR hybrids were designed by fusing the N-terminal region of bovine sRP105 to the C-terminal region of hagfish VLR B.61, in a design previously reported for other TLRs<sup>5-6,8,39</sup>. They were co-expressed and co-purified with bovine MD-1 (residues 22-159), as for the wild-type complex. One of sRP105-VLR hybrids [sRP105 residues 24-521 (LRRNT and LRR1-20) and VLR B.61 residues 125-200] provided a sufficient amount of protein for structural studies, and its complex with MD-1 was used to obtain experimental phases.

**Crystallization and data collection.** sRP105-VLR–MD-1 and methylated sRP105–MD-1 were crystallized at 23°C by sitting drop, vapor diffusion in spacegroups  $P2_12_12_1$  and  $P1$  with one and four 2:2 complexes, respectively, in the asymmetric unit. The sRP105-VLR–MD-1 crystals were obtained by mixing 0.5  $\mu$ l of 10 mg  $ml^{-1}$  protein solution with 0.5  $\mu$ l of well solution containing 20% w/v PEG MME 5000, 0.2 M  $NH_4Cl$ , and 100 mM sodium acetate pH 4.6. Heavy atom

derivative crystals were prepared for experimental phasing by soaking sRP105-VLR–MD-1 crystals in 1 mM  $K_2Pt(NO_2)_4$  solution. X-ray diffraction data on the platinum derivative were collected at Pt peak wavelength (1.0718 Å) at 100 K at the Stanford Synchrotron Radiation Lightsource (SSRL) beamline 9-2. The methylated sRP105–MD-1 complex was crystallized in a drop containing 1 µl of 10 mg ml<sup>-1</sup> protein solution and 1 µl of well solution containing 19% w/v PEG 8000 and 100 mM Tris pH 8.5. The sRP105–MD-1 diffraction data were collected at a wavelength of 1.0333 Å at 100 K at the Advanced Photon Source (APS) beamline 23ID-B. X-ray data were processed with *HKL2000*<sup>40</sup>. Data collection statistics are summarized in Table 1.

**Structure determination and refinement.** The sRP105-VLR–MD-1 structure was determined by a single-wavelength anomalous diffraction (SAD) phasing experiment performed on a platinum derivative crystal. 11 heavy atom sites were located by *SHELXD*<sup>41</sup> and phases were calculated by *SHELXE*<sup>41</sup>. The initial model of the 2:2 sRP105-VLR–MD-1 complex was built by docking and modifying the structures of chicken MD-1 (PDB ID code 3mtx)<sup>33</sup> and mouse sTLR4 (PDB ID code 2z64)<sup>5</sup> against electron density map obtained from *DM*<sup>42</sup>. The sRP105-VLR–MD-1 model was built with *COOT*<sup>43</sup> and refined with *REFMAC5*<sup>44</sup>. The sRP105–MD-1 structure was determined by molecular replacement with *PHASER*<sup>45</sup> using the 1:1 sRP105-VLR–MD-1 structure as a search model. Iterative model building and refinement were performed using *COOT*<sup>43</sup> and *REFMAC5*<sup>44</sup>, respectively. The Ramachandran plot generated with *MolProbity* (<http://molprobity.biochem.duke.edu>) shows that 93.9% of residues are in favored regions with only 0.3% as outliers. Final refinement statistics are summarized in Table 1. All the molecular graphic figures were made using *Pymol* (<http://www.pymol.org>).

**METHODS-ONLY REFERENCES**

37. Walter, T.S. *et al.* Lysine methylation as a routine rescue strategy for protein crystallization. *Structure* **14**, 1617-1622 (2006).
38. Jentoft, N. & Dearborn, D.G. Protein labeling by reductive alkylation. *Methods Enzymol* **91**, 570-579 (1983).
39. Jin, M.S. & Lee, J.O. Application of hybrid LRR technique to protein crystallization. *BMB Rep* **41**, 353-357 (2008).
40. Otwinowski, Z. & Minor, W. Processing x-ray diffraction data collected in oscillation mode. *Methods Enzymol* **276**, 307-326 (1997).
41. Sheldrick, G.M. A short history of SHELX. *Acta Crystallogr A* **64**, 112-122 (2008).
42. Cowtan, K. 'dm': An automated procedure for phase improvement by density modification. *Joint CCP4 and ESF-EACBM Newsletter on Protein Crystallography* **31**, 34-38 (1994).
43. Emsley, P. & Cowtan, K. Coot: model-building tools for molecular graphics. *Acta Crystallogr D Biol Crystallogr* **60**, 2126-2132 (2004).
44. Murshudov, G.N., Vagin, A.A. & Dodson, E.J. Refinement of macromolecular structures by the maximum-likelihood method. *Acta Crystallogr D Biol Crystallogr* **53**, 240-255 (1997).
45. McCoy, A.J. *et al.* Phaser crystallographic software. *J Appl Crystallogr* **40**, 658-674 (2007).
