# Supplementary material
Source: PubMed Central journal article supplement (PMC3362203)
Supplement: NIHMS357664-supplement-Supplementary_Materials.pdf [file NIHMS357664-supplement-Supplementary_Materials.pdf]

## **Supplemental Information**

### **An unusual dimeric structure and assembly for RP105/MD-1, a regulator for the TLR4 response to LPS**

Sung-il Yoon, Minsun Hong, Ian A. Wilson

Supplementary Table 1

Supplementary Figures 1-7

**Supplementary Table 1. Data collection and refinement statistics**

|                                                          | sRP105-VLR/MD-1                                | sRP105/MD-1              |
|----------------------------------------------------------|------------------------------------------------|--------------------------|
| <b>Data Collection</b>                                   |                                                |                          |
| Space group                                              | P 2 <sub>1</sub> 2 <sub>1</sub> 2 <sub>1</sub> | P 1                      |
| Cell parameters                                          |                                                |                          |
| <i>a</i> , <i>b</i> , <i>c</i> (Å)                       | 89.58, 137.52, 141.67                          | 101.51, 141.58, 141.95   |
| $\alpha$ , $\beta$ , $\gamma$ (°)                        | 90, 90, 90                                     | 94.00, 91.66, 91.37      |
| Wavelength (Å)                                           | 1.0718                                         | 1.0333                   |
| Resolution (Å)                                           | 20.00 - 3.10 (3.21-3.10)*                      | 20.00 - 2.91 (3.00-2.91) |
| No. observations                                         | 261,804                                        | 332,433                  |
| No. unique reflections                                   | 32,274                                         | 160,125                  |
| <i>R</i> <sub>merge</sub> (%)                            | 9.0 (80.3)                                     | 6.3 (45.7)               |
| <i>I</i> / $\sigma$ <i>I</i>                             | 34.3 (2.8)                                     | 18.2 (1.8)               |
| Completeness (%)                                         | 98.9 (93.1)                                    | 93.5 (73.0)              |
| Redundancy                                               | 8.1 (7.1)                                      | 2.1 (1.9)                |
| <b>Refinement</b>                                        |                                                |                          |
| Resolution (Å)                                           |                                                | 20.00 - 2.91             |
| No. reflections (total / test)                           |                                                | 152,067 / 8,030          |
| <i>R</i> <sub>cryst</sub> / <i>R</i> <sub>free</sub> (%) |                                                | 23.86 / 27.53            |
| No. atoms                                                |                                                |                          |
| Protein                                                  |                                                | 42,570                   |
| Carbohydrate                                             |                                                | 1,064                    |
| Pseudoligand                                             |                                                | 124                      |
| Water                                                    |                                                | 37                       |
| <i>B</i> -values (Å <sup>2</sup> )                       |                                                |                          |
| Protein                                                  |                                                | 76.4                     |
| Carbohydrate                                             |                                                | 49.4                     |
| Pseudoligand                                             |                                                | 81.8                     |
| Water                                                    |                                                | 42.8                     |
| R.m.s. deviations                                        |                                                |                          |
| Bond lengths (Å)                                         |                                                | 0.013                    |
| Bond angles (°)                                          |                                                | 1.44                     |

\*Numbers in parenthesis are for the highest resolution shell.

## Supplementary References

1. Yoon, S.I., Hong, M., Han, G.W. & Wilson, I.A. Crystal structure of soluble MD-1 and its interaction with lipid IVa. *Proc Natl Acad Sci U S A* **107**, 10990-10995 (2010).
2. Harada, H., Ohto, U. & Satow, Y. Crystal structure of mouse MD-1 with endogenous phospholipid bound in its cavity. *J Mol Biol* **400**, 838-846 (2010).
